# Supplementary material for: Identification of a Novel Betacoronavirus (Merbecovirus) in Amur Hedgehogs from China
Source: PubMed Central journal article supplement (PMC6893546; doi:10.3390/v11110980), 2019-10-24
Supplement: viruses-11-00980-s001.pdf [file viruses-11-00980-s001.pdf]

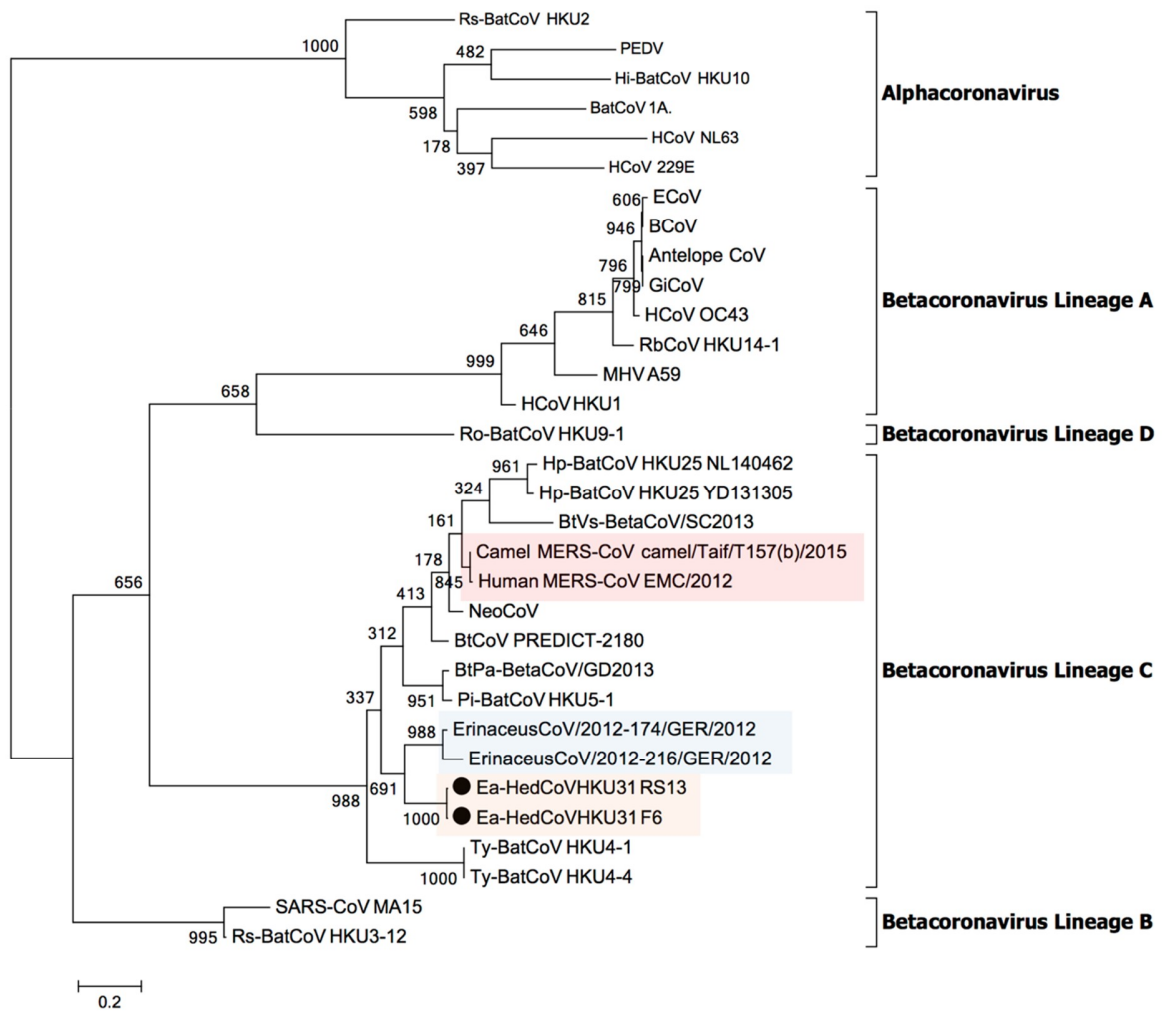

**Figure S1.** Phylogenetic analysis of the nt sequences of the 383-nt fragment of RdRp of the 2 positive samples identified in hedgehogs from China in this study.

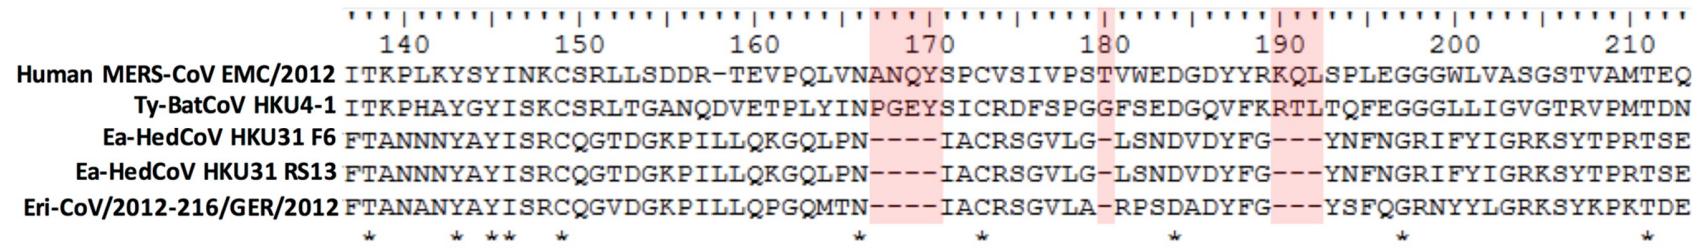

**Figure S2.** Multiple alignment of the amino acid sequences of the receptor-binding domain (RBD) of the spike protein of MERS-CoV and corresponding sequences in Ea-HedCoV HKU31 and other members of Merbecovirus. Asterisks indicate positions with fully conserved residues. The three amino acid deletions in Ea-HedCoV HKU31 compared to MERS-CoV and Ty-BatCoV HKU4 are highlighted in red color.

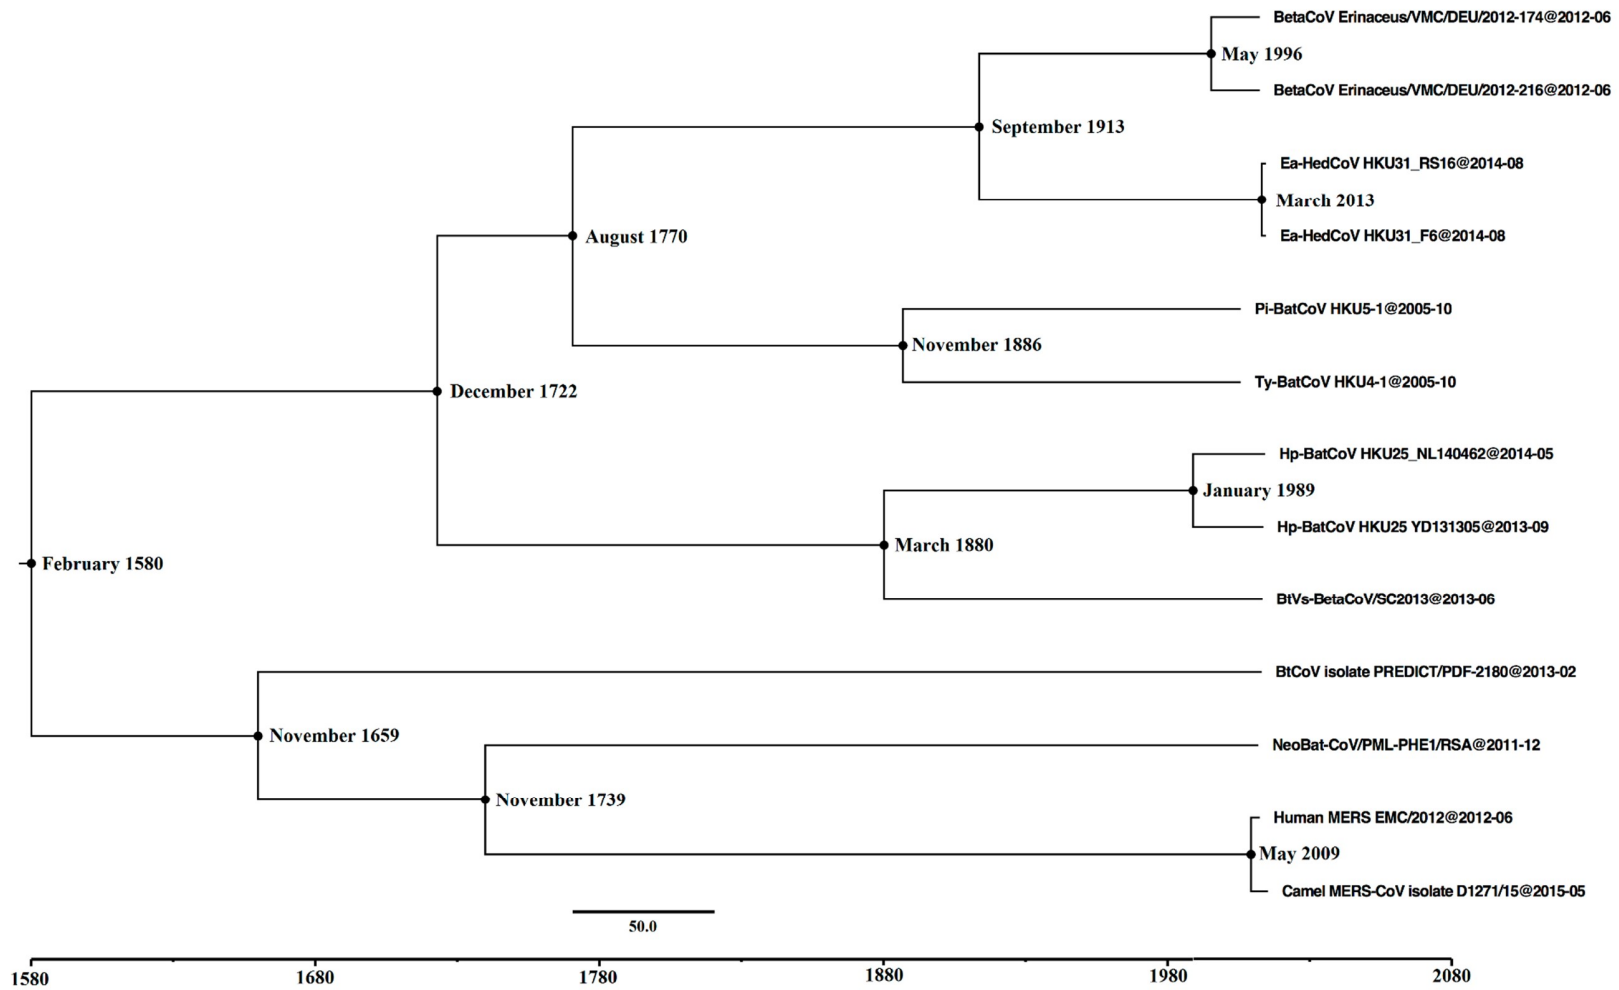

**Figure S3.** Estimation of tMRCA of members of Merbecovirus based on Orf1ab. The mean estimated dates were labeled. The taxa were labeled with their sampling dates.

**Table S1.** Detection of CoVs in different hedgehog and rodent species by RT-PCR of the 440-bp fragment of RdRp gene

| Scientific name            | Common name            | No. of samples tested | No. of samples positive for CoV | CoV detected/closest match in GenBank     | nt identity to closest match (%) | Sampling location of samples |
|----------------------------|------------------------|-----------------------|---------------------------------|-------------------------------------------|----------------------------------|------------------------------|
| <i>Suncus Murinus</i>      | Asian house shrew      | 18                    | 0/18 (0)                        | NA                                        | N/A                              | Hong Kong                    |
| <i>Crocidura attenuata</i> | Asian gray shrew       | 11                    | 0/11 (0)                        | NA                                        | N/A                              | Hong Kong                    |
| <i>Erinaceus amurensis</i> | Amur hedgehog          | 27                    | 2/27 (7.4)                      | Betacoronavirus<br>Erinaceus/VMC/DEU/2012 | 84                               | Guangdong,<br>China          |
| <i>Rattus rattus</i>       | Black rat              | 35                    | 0/35 (0)                        | NA                                        | N/A                              | Guangdong,<br>China          |
| <i>Rattus andamanensis</i> | Indochinese forest rat | 116                   | 0/116 (0)                       | NA                                        | N/A                              | Guangdong,<br>China          |

**Table S2.** Pairwise comparisons of *Coronaviridae*-wide conserved domains in replicase polyprotein 1ab between *Ea-HedCoV* HKU31 and other members of *Merbecovirus*

| Replicase polyprotein domain | Pairwise amino acid sequence identity with the <i>Ea-HedCoV</i> HKU31 sequence (%) |          |        |        |                        |                        |                         |
|------------------------------|------------------------------------------------------------------------------------|----------|--------|--------|------------------------|------------------------|-------------------------|
|                              | Erinaceus CoV                                                                      | MERS-CoV | NeoCoV | SC2013 | <i>Ty</i> -BatCoV HKU4 | <i>Pi</i> -BatCoV HKU5 | <i>Hp</i> -BatCoV HKU25 |
| nsp3 (ADRP)                  | 71.1                                                                               | 59.7     | 59.5   | 58.7   | 53.4                   | 53.1                   | 57.5                    |
| nsp5 (3CL <sup>pro</sup> )   | 85.9                                                                               | 77.8     | 77.1   | 78.4   | 71.2                   | 75.5                   | 78.8                    |
| nsp12 (RdRp)                 | 91.3                                                                               | 89.4     | 89.2   | 90.7   | 87.6                   | 89.1                   | 90.3                    |
| nsp13 (Hel)                  | 95.7                                                                               | 91.1     | 91.6   | 91.6   | 89.8                   | 90.5                   | 91.8                    |
| nsp14 (ExoN)                 | 92.1                                                                               | 88.7     | 88.9   | 89.3   | 85.1                   | 88.7                   | 88.5                    |
| nsp15(NendoU)                | 90.7                                                                               | 82.5     | 82.2   | 83.1   | 74.6                   | 76.6                   | 83.4                    |
| nsp16 (O-MT)                 | 90.4                                                                               | 87.8     | 87.8   | 86.8   | 82.8                   | 83.8                   | 87.8                    |
| Concatenated domains         | 83.5                                                                               | 76.7     | 76.6   | 75.5   | 72.0                   | 72.9                   | 79.3                    |

**Table S3.** Coding potential and predicted domains in different proteins of *Ea-HedCoV HKU31*

| ORF   | Nucleotide position (start-end) | No. of nucleotides | No. of amino acids | Frame(s) | Putative function of domain <sup>a</sup>                                                                                                             | Amino acid positions                                                  | Putative TRS                  |                                                            |
|-------|---------------------------------|--------------------|--------------------|----------|------------------------------------------------------------------------------------------------------------------------------------------------------|-----------------------------------------------------------------------|-------------------------------|------------------------------------------------------------|
|       |                                 |                    |                    |          |                                                                                                                                                      |                                                                       | Nucleotide position in genome | TRS sequence (distance [no. of bases] to AUG) <sup>b</sup> |
| 1ab   | 244-21497                       | 21254              | 7020               | +1,+3    |                                                                                                                                                      |                                                                       | 61                            | AACGAAC (176)AUG                                           |
| nsp1  | 244-843                         | 600                | 200                | +1       | Unknown                                                                                                                                              | 1-200                                                                 |                               |                                                            |
| nsp2  | 844-2820                        | 1977               | 659                | +1       | Unknown<br>ADRP,<br>putative domain PL1 <sup>pro</sup>                                                                                               | 201-859                                                               |                               |                                                            |
| nsp3  | 2821-8490                       | 5670               | 1890               | +1       | Nucleic Acid Binding domain<br>Single stranded polyA binding domain                                                                                  | 860-2749                                                              |                               |                                                            |
| nsp4  | 8491-10005                      | 1515               | 505                | +1       | Hydrophobic domain                                                                                                                                   | 2750-3254                                                             |                               |                                                            |
| nsp5  | 10006-10923                     | 918                | 306                | +1       | 3CL <sup>pro</sup>                                                                                                                                   | 3255-3560                                                             |                               |                                                            |
| nsp6  | 10924-11799                     | 876                | 292                | +1       | Hydrophobic domain                                                                                                                                   | 3561-3852                                                             |                               |                                                            |
| nsp7  | 11800-12048                     | 249                | 83                 | +1       | Peptidase                                                                                                                                            | 3853-3935                                                             |                               |                                                            |
| nsp8  | 12049-12645                     | 597                | 199                | +1       | Peptidase                                                                                                                                            | 3936-4134                                                             |                               |                                                            |
| nsp9  | 12646-12975                     | 330                | 110                | +1       | RNA binding domain                                                                                                                                   | 4135-4244                                                             |                               |                                                            |
| nsp10 | 12976-13392                     | 417                | 139                | +1       | RNA binding domain<br>Zinc ion binding motif                                                                                                         | 4245-4383                                                             |                               |                                                            |
| nsp12 | 13393-16194                     | 2802               | 934                | +3       | RdRp                                                                                                                                                 | 4384-5317                                                             |                               |                                                            |
| nsp13 | 16195-17988                     | 1794               | 598                | +3       | Hel                                                                                                                                                  | 5318-5915                                                             |                               |                                                            |
| nsp14 | 17989-19560                     | 1572               | 524                | +3       | ExoN, N7-MTase                                                                                                                                       | 5916-6439                                                             |                               |                                                            |
| nsp15 | 19561-20589                     | 1029               | 343                | +3       | NendoU                                                                                                                                               | 6440-6782                                                             |                               |                                                            |
| nsp16 | 20590-21495                     | 906                | 302                | +3       | O-MT                                                                                                                                                 | 6783-7084                                                             |                               |                                                            |
| S     | 21442-25425                     | 3984               | 1327               | +1       | Type 1 membrane glycoprotein<br>Receptor binding domain<br>Cleavage site<br>Two heptad repeats<br>Transmembrane domain<br>Signal peptide (Secretory) | 368-621<br>760/761<br>984-1097 (HR1),<br>1219-1257 (HR2)<br>1289-1311 | 21390                         | AACGAAC(45)AUG                                             |
| ORF3a | 25441-25752                     | 312                | 103                | +1       |                                                                                                                                                      | 1-20                                                                  | 25427                         | AACGAAC(7) AUG                                             |
| ORF3b | 25667-25957                     | 291                | 96                 | +2       |                                                                                                                                                      |                                                                       |                               |                                                            |
| ORF4a | 25709-25957                     | 249                | 83                 | +2       | Double stranded RNA binding domain<br>Type I Interferon Antagonist<br>Nuclear Localization Signal (NLS)                                              | 3-73                                                                  | 25700                         | AACGAAC(4) AUG                                             |
| ORF4b | 25947-26624                     | 678                | 225                | +3       | Two 2',5'-phosphodiesterase (PDE) motifs, AKAP18 Delta<br>Host RNase L activation inhibitor                                                          | 25-50<br>105-108, 188-191                                             |                               |                                                            |

|       |             |      |     |    |                             |                      |       |                         |
|-------|-------------|------|-----|----|-----------------------------|----------------------|-------|-------------------------|
| ORF5  | 26634-27320 | 687  | 228 | +3 | Signal peptide (Secretory)  | 1-28                 | 26626 | <b>AACGAAC</b> (1) AUG  |
| E     | 27395-27643 | 249  | 82  | +2 | Three transmembrane domains | 31-55, 67-87, 93-112 | 27387 | <b>AACGAAC</b> (1) AUG  |
| M     | 27654-28310 | 657  | 218 | +3 | Transmembrane domain        | 12-34                | 27387 | <b>AACGAAC</b> (1) AUG  |
| N     | 28365-29648 | 1284 | 427 | +3 | Three Transmembrane domains | 20-38, 50-71, 77-95  | 27642 | <b>AACGAAC</b> (5) AUG  |
|       |             |      |     |    | RNA Binding domain          | 20-171               | 28342 | <b>AACGAAT</b> (16) AUG |
|       |             |      |     |    | Dimerization domain         | 243-361              |       |                         |
| ORF8b | 28411-28977 | 567  | 188 | +1 | Unknown                     |                      |       |                         |

<sup>a</sup> ADRP, ADP-ribose 1 -phosphatase; PLPro, papain-like protease; 3CLpro, 3C-like protease; RdRp, RNA-dependent RNA polymerase; Hel, helicase; ExoN, 3'-to-5' exonuclease; N7-MTase, (guanine-N7)-methyltransferase; NendoU, nidoviral uridylate-specific endoribonuclease; O-MT, 2'-O-ribose methyltransferase.

<sup>b</sup> Boldface indicates putative TRS sequences

**Table S4.** Cleavage site used between nsps in members of Merbecovirus

| nsp         | Cleavage site   |               |          |        |        |                |                |                 |     |
|-------------|-----------------|---------------|----------|--------|--------|----------------|----------------|-----------------|-----|
|             | Ea-HedCoV HKU31 | Erinaceus CoV | MERS-CoV | NeoCoV | SC2013 | Ty-BatCoV HKU4 | Pi-BatCoV HKU5 | Hp-BatCoV HKU25 |     |
| nsp1/nsp2   | G/D             | G/D           | G/D      | G/D    | G/D    | G/D            | G/D            | G/D             | G/D |
| nsp2/nsp3   | G/A             | G/A           | G/A      | G/A    | G/A    | G/A            | G/M            | G/A             | G/A |
| nsp3/nsp4   | G/S             | <b>G/S</b>    | G/A      | G/A    | G/A    | G/A            | G/A            | G/A             | G/A |
| nsp4/nsp5   | Q/S             | Q/S           | Q/S      | Q/S    | Q/S    | Q/S            | Q/S            | Q/S             | Q/S |
| nsp5/nsp6   | Q/S             | Q/S           | Q/S      | Q/S    | Q/S    | Q/S            | Q/S            | Q/S             | Q/S |
| nsp6/nsp7   | Q/S             | Q/S           | Q/S      | Q/S    | Q/S    | Q/S            | Q/S            | Q/S             | Q/S |
| nsp7/nsp8   | <b>Q/S</b>      | <b>Q/S</b>    | Q/A      | Q/A    | Q/A    | Q/A            | Q/A            | Q/A             | Q/A |
| nsp8/nsp9   | Q/N             | Q/N           | Q/N      | Q/N    | Q/N    | Q/N            | Q/N            | Q/N             | Q/N |
| nsp9/nsp10  | Q/A             | Q/A           | Q/A      | Q/A    | Q/A    | Q/A            | Q/A            | Q/A             | Q/A |
| nsp10/nsp12 | H/S             | H/S           | Q/S      | Q/S    | Q/S    | Q/S            | Q/S            | Q/S             | Q/S |
| nsp12/nsp13 | Q/A             | Q/A           | Q/A      | Q/A    | Q/A    | Q/A            | Q/A            | Q/A             | Q/A |
| nsp13/nsp14 | Q/S             | Q/S           | Q/S      | Q/S    | Q/S    | Q/S            | Q/S            | Q/S             | Q/S |
| nsp14/nsp15 | Q/G             | Q/G           | Q/G      | Q/G    | Q/G    | Q/G            | Q/G            | Q/G             | Q/G |
| nsp15/nsp16 | <b>Q/G</b>      | Q/A           | Q/A      | Q/A    | Q/A    | Q/A            | Q/A            | Q/A             | Q/A |

Unique cleavage sites are in bold
